# Supplementary material for: CAl4Be and CAl3Be2−: global minima with a planar pentacoordinate carbon atom
Source: Royal Society of Chemistry journal article supplement (doi:10.1039/c0cc03479g), 2010-01-01
Supplement: c0cc03479g.pdf [file c0cc03479g.pdf]

# Electronic Supplementary Material

## CAI<sub>4</sub>Be and CAI<sub>3</sub>Be<sub>2</sub><sup>-</sup>: Global minima with a planar pentacoordinate carbon atom

J. Oscar C. Jimenez-Halla,<sup>a</sup> Yan-Bo Wu,<sup>b</sup> Zhi-Xiang Wang,<sup>\*b</sup> Rafael Islas,<sup>a</sup>

Thomas Heine,<sup>\*c</sup> and Gabriel Merino<sup>\*a</sup>

<sup>a</sup> *Departamento de Química, Universidad de Guanajuato, Noria Alta s/n*

*C.P. 36050, Guanajuato, Gto. México.*

<sup>b</sup> *College of Chemistry and Chemical Engineering, Graduate University of*

*Chinese Academy of Sciences, Beijing, 100049, P. R. China.*

<sup>c</sup> *School of Engineering and Science, Jacobs University Bremen, 28759 Bremen, Germany*

**Cartesian coordinates of all the species studied in this work calculated at CCSD(T)/aug-cc-pVTZ level.**

CA<sub>14</sub>Be clusters

**1a**

|    |            |             |             |
|----|------------|-------------|-------------|
| C  | 0.00000000 | 0.00000000  | 0.22529475  |
| Be | 0.00000000 | 0.00000000  | 1.91807898  |
| Al | 0.00000000 | 2.05833477  | 1.02973571  |
| Al | 0.00000000 | -1.26220664 | -1.39039053 |
| Al | 0.00000000 | -2.05833477 | 1.02973571  |
| Al | 0.00000000 | 1.26220664  | -1.39039053 |

**2a**

|    |             |             |             |
|----|-------------|-------------|-------------|
| C  | -0.65360653 | -1.07771756 | 0.00000000  |
| Be | -1.47856540 | 0.32171428  | 0.00000000  |
| Al | 0.20614371  | -1.24538399 | 1.72884138  |
| Al | 0.19228426  | 1.45084163  | -1.27867802 |
| Al | 0.19228426  | 1.45084163  | 1.27867802  |
| Al | 0.20614371  | -1.24538399 | -1.72884138 |

**3a**

|    |             |             |             |
|----|-------------|-------------|-------------|
| Al | 0.00000000  | 1.91610961  | -1.18186826 |
| C  | 0.00000000  | 0.00004716  | -0.64490420 |
| Al | -1.65939364 | -0.95803954 | -1.18155379 |
| Al | 1.65939364  | -0.95803954 | -1.18155379 |

Be 0.00000000 0.00010556 1.01689277

Al 0.00000000 -0.00018423 3.51937427

**4a**

C 0.00000000 0.00000000 0.02251030

Be 0.00000000 0.00000000 -2.84745039

Al 0.00000000 1.56989217 -1.12582766

Al 0.00000000 -1.56989217 -1.12582766

Al 0.00000000 1.36975356 1.56154071

Al 0.00000000 -1.36975356 1.56154071

**5a**

C -0.01963400 0.85143341 0.00000000

Be -1.12392427 -0.41062108 0.00000000

Al 1.07237325 -0.98768451 0.00000000

Al -1.50048476 2.12993825 0.00000000

Al -0.96819970 -2.97910750 0.00000000

Al 1.79043047 1.58784842 0.00000000

**6a**

C 1.04498785 -0.49250572 0.00000000

Be 1.13308762 -2.12367415 0.00000000

Al -0.91049426 -1.31974455 0.00000000

Al -2.82401031 0.83317071 0.00000000

Al 2.89313122 0.24040660 0.00000000

|    |            |            |            |
|----|------------|------------|------------|
| Al | 0.00775187 | 1.16256210 | 0.00000000 |
|----|------------|------------|------------|

**7a**

|    |            |             |            |
|----|------------|-------------|------------|
| Al | 0.81877750 | -1.52797365 | 0.00000000 |
|----|------------|-------------|------------|

|    |             |            |            |
|----|-------------|------------|------------|
| Al | -2.51868764 | 0.72275743 | 0.00000000 |
|----|-------------|------------|------------|

|    |            |            |            |
|----|------------|------------|------------|
| Al | 2.83338105 | 0.51222581 | 0.00000000 |
|----|------------|------------|------------|

|    |            |            |            |
|----|------------|------------|------------|
| Al | 0.01759731 | 1.09288951 | 0.00000000 |
|----|------------|------------|------------|

|   |             |             |            |
|---|-------------|-------------|------------|
| C | -0.90712986 | -0.70611161 | 0.00000000 |
|---|-------------|-------------|------------|

|    |             |             |            |
|----|-------------|-------------|------------|
| Be | -2.33364935 | -1.48606647 | 0.00000000 |
|----|-------------|-------------|------------|

**8a**

|   |            |             |            |
|---|------------|-------------|------------|
| C | 1.36925901 | -0.14194991 | 0.00000000 |
|---|------------|-------------|------------|

|    |             |            |            |
|----|-------------|------------|------------|
| Be | -0.00968203 | 0.71127817 | 0.00000000 |
|----|-------------|------------|------------|

|    |            |             |            |
|----|------------|-------------|------------|
| Al | 0.34185651 | -1.71904489 | 0.00000000 |
|----|------------|-------------|------------|

|    |             |             |            |
|----|-------------|-------------|------------|
| Al | -2.10217618 | -0.71132082 | 0.00000000 |
|----|-------------|-------------|------------|

|    |            |            |            |
|----|------------|------------|------------|
| Al | 3.27359996 | 0.29847019 | 0.00000000 |
|----|------------|------------|------------|

|    |             |            |            |
|----|-------------|------------|------------|
| Al | -2.14442928 | 1.97110625 | 0.00000000 |
|----|-------------|------------|------------|

$\text{CAI}_3\text{Be}_2^-$  clusters

**1b**

|    |            |            |            |
|----|------------|------------|------------|
| Be | 0.00000000 | 1.60108880 | 0.78194487 |
|----|------------|------------|------------|

|    |            |             |            |
|----|------------|-------------|------------|
| Be | 0.00000000 | -1.60108880 | 0.78194487 |
|----|------------|-------------|------------|

|   |            |            |            |
|---|------------|------------|------------|
| C | 0.00000000 | 0.00000000 | 0.15572797 |
|---|------------|------------|------------|

|    |            |             |             |
|----|------------|-------------|-------------|
| Al | 0.00000000 | 0.00000000  | 2.37375828  |
| Al | 0.00000000 | -1.29787359 | -1.46892500 |
| Al | 0.00000000 | 1.29787359  | -1.46892500 |

**2b**

|    |            |             |             |
|----|------------|-------------|-------------|
| Be | 0.00000000 | 0.96818486  | -2.01790271 |
| Be | 0.00000000 | -0.96818486 | -2.01790271 |
| C  | 0.00000000 | 0.00000000  | -0.50660659 |
| Al | 0.00000000 | 0.00000000  | 1.52097579  |
| Al | 0.00000000 | -2.05310406 | -0.00708839 |
| Al | 0.00000000 | 2.05310406  | -0.00708839 |

**3b**

|    |             |             |            |
|----|-------------|-------------|------------|
| Be | 2.40165260  | 1.63548736  | 0.00000000 |
| Be | 0.38401131  | 1.91080491  | 0.00000000 |
| C  | 0.03335591  | 0.28294120  | 0.00000000 |
| Al | -0.75778754 | -1.57218819 | 0.00000000 |
| Al | -1.85987145 | 0.96727560  | 0.00000000 |
| Al | 1.76729118  | -0.64750288 | 0.00000000 |

**4b**

|    |             |             |            |
|----|-------------|-------------|------------|
| Be | -0.52924986 | -2.43843377 | 0.00000000 |
| Be | 0.96498681  | -1.08361674 | 0.00000000 |
| C  | -0.72977377 | -0.80450882 | 0.00000000 |
| Al | -2.57306069 | -0.16784616 | 0.00000000 |

Al 2.76677485 0.61218725 0.00000000

Al 0.01660067 1.06108525 0.00000000

**5b**

Be -0.97403443 -0.67486335 1.06397235

Be -0.97403443 -0.67486335 -1.06397235

C -0.51271828 0.56563534 0.00000000

Al -0.84686028 2.43844783 0.00000000

Al 1.48276906 0.12042731 0.00000000

Al 0.26982135 -2.34484578 0.00000000

**6b**

Be 1.04241316 -2.11696525 0.00000000

Be 0.01081314 0.90761983 0.00000000

C 0.95876622 -0.47727922 0.00000000

Al 2.64824315 0.46738595 0.00000000

Al -1.03556685 -1.18263283 0.00000000

Al -2.39553481 1.29697351 0.00000000

**7b**

Be 0.00000000 0.97903977 0.05803728

Be 0.00000000 -0.97903977 0.05803728

C 0.00000000 0.00000000 1.36518956

Al 0.00000000 0.00000000 3.25324650

Al -1.24216473 0.00000000 -1.96006530

Al 1.24216473 0.00000000 -1.96006530

**8b**

Be 0.58734194 -1.51209209 0.00000000

Be -0.01418554 0.56084015 0.00000000

C 1.45231272 -0.13295220 0.00000000

Al -1.72969258 -1.27623254 0.00000000

Al 3.29835026 0.31707293 0.00000000

Al -2.41157278 1.30402575 0.00000000

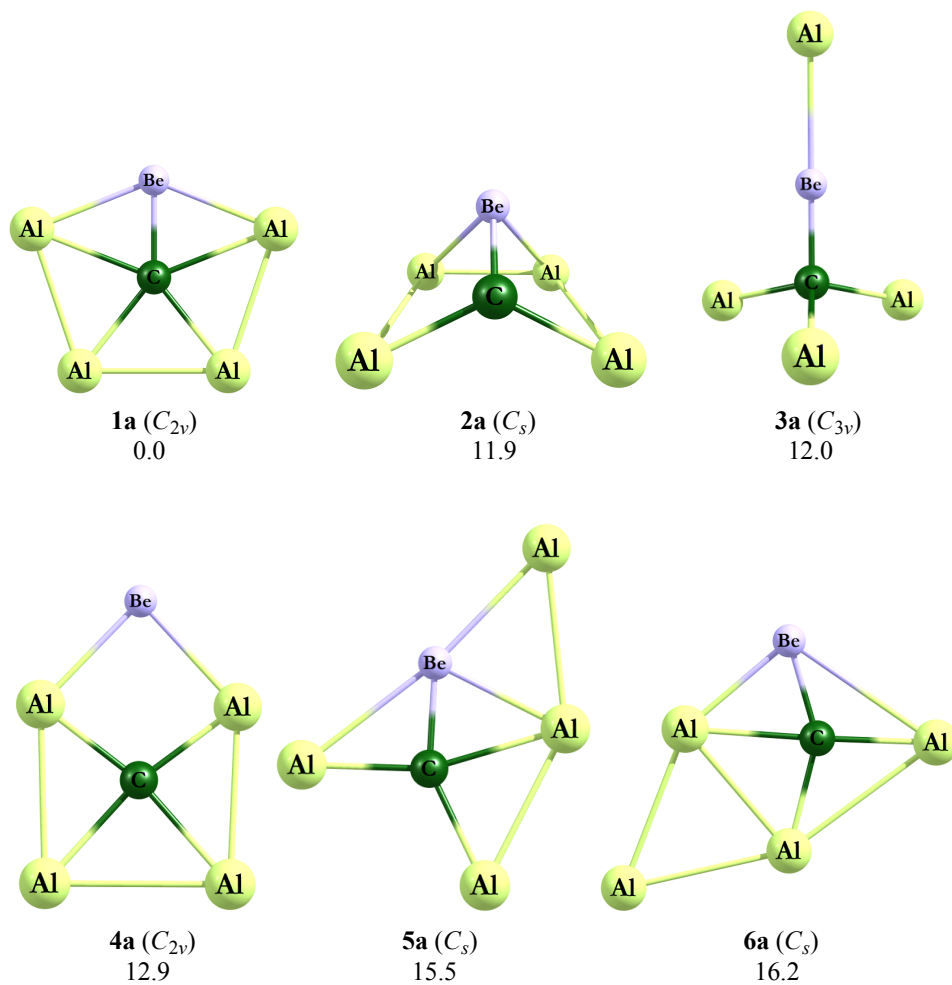

**Figure SM-1.** Most stable isomers of  $CA_4Be$  optimized at the CCSD(T)/aug-cc-pVTZ level of theory.



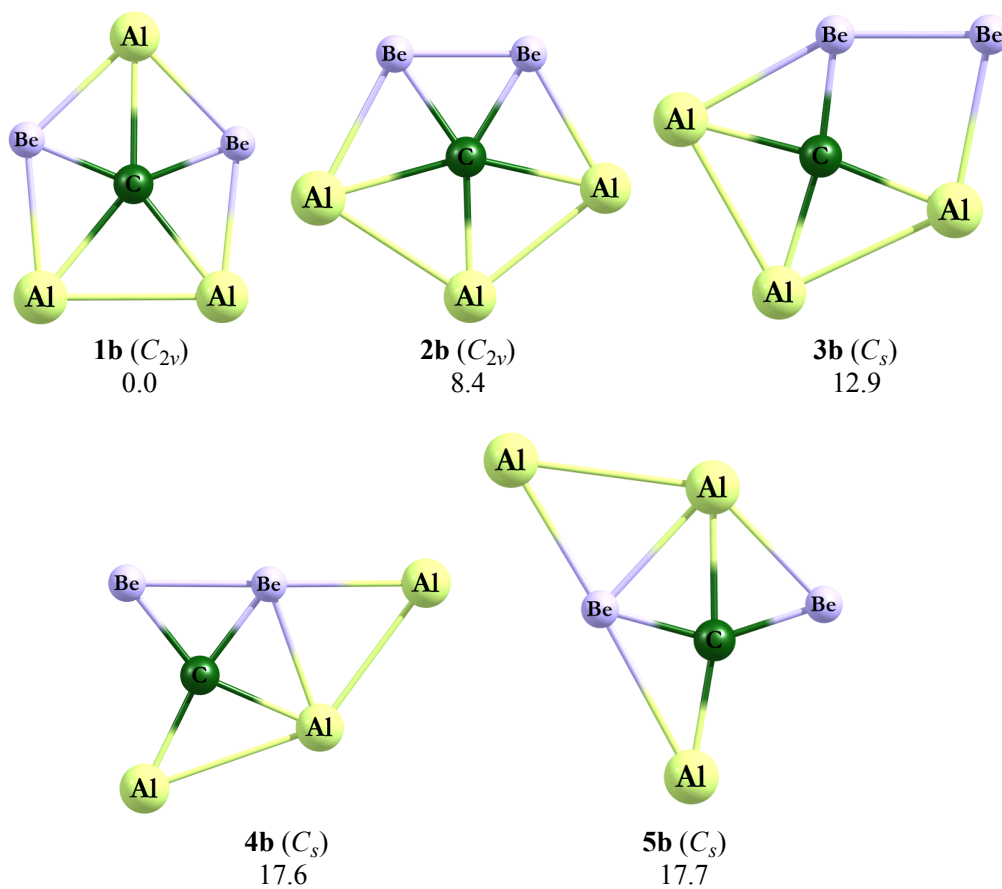

**Figure SM-2.** Most stable isomers of  $CA_3Be_2^-$  optimized at the CCSD(T)/aug-cc-pVTZ level of theory.
